# Supplementary material for: Rhodium porphyrin molecule-based catalysts for the hydrogenation of biomass derived levulinic acid to biofuel additive γ-valerolactone
Source: Royal Society of Chemistry journal article supplement (doi:10.1039/d0nj01180k), 2020-01-01
Supplement: d0nj01180k1.pdf [file d0nj01180k1.pdf]

## Supplementary Materials

# Rhodium porphyrin molecule-based catalysts for the hydrogenation of biomass derived levulinic acid to biofuel additive $\gamma$ -valerolactone

*Kaiprathu Anjali<sup>[a]</sup>, Naragalu J Venkatesha<sup>[b]</sup>, Jayaraj Christopher<sup>[c]</sup>, and Ayyamperumal*

*Sakthivel<sup>[a\*]</sup>*

*<sup>[a]</sup> Inorganic Materials & Heterogeneous Catalysis Laboratory, Department of Chemistry,  
School of Physical Sciences, Central University of Kerala Kasaragod, Kasaragod 671320, India*

*<sup>[b]</sup> Department of Chemistry, Bangalore Institute of Technology, Bengaluru 560004, India*

*<sup>[c]</sup> Indian Oil Corporation Limited, R&D Centre, Faridabad 121007, India*

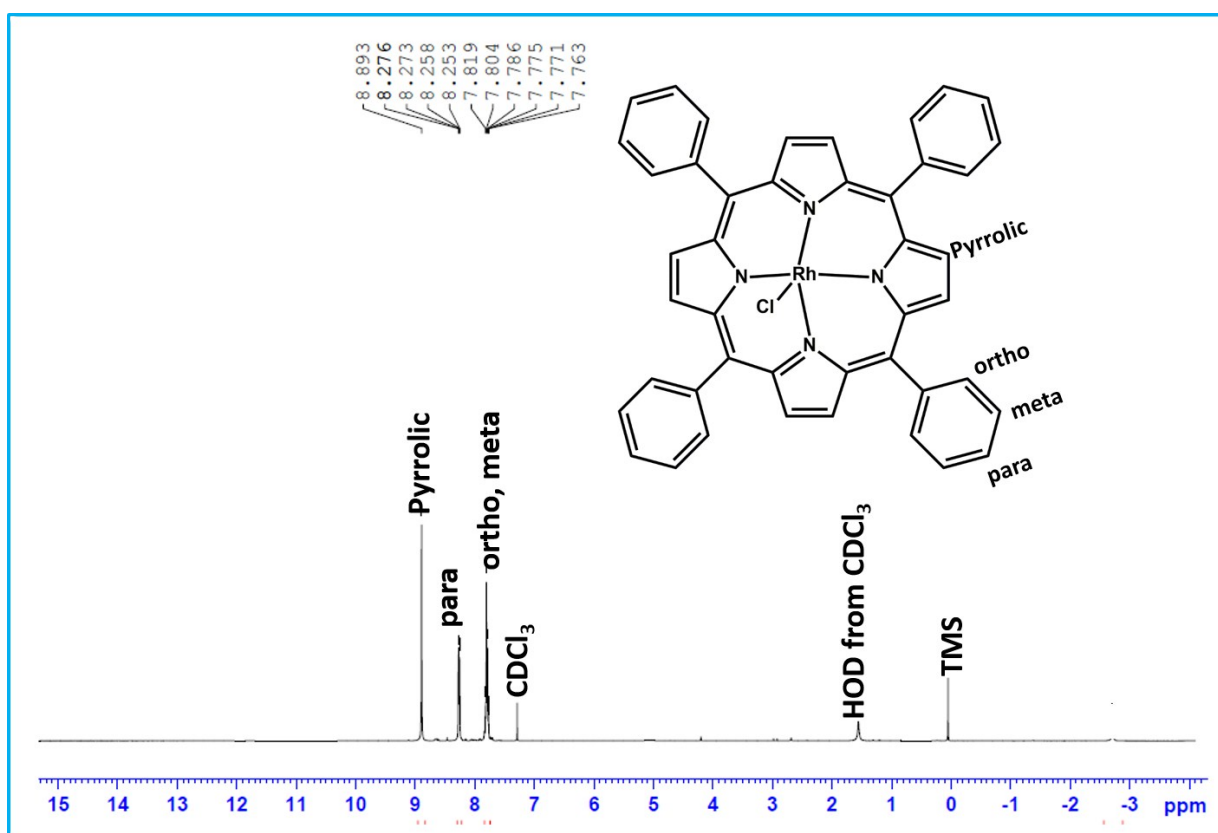

## Supplementary Materials

Figure S1;  $^1\text{H}$  NMR spectrum of RhTPP ( $\text{CDCl}_3$ , 400MHz)

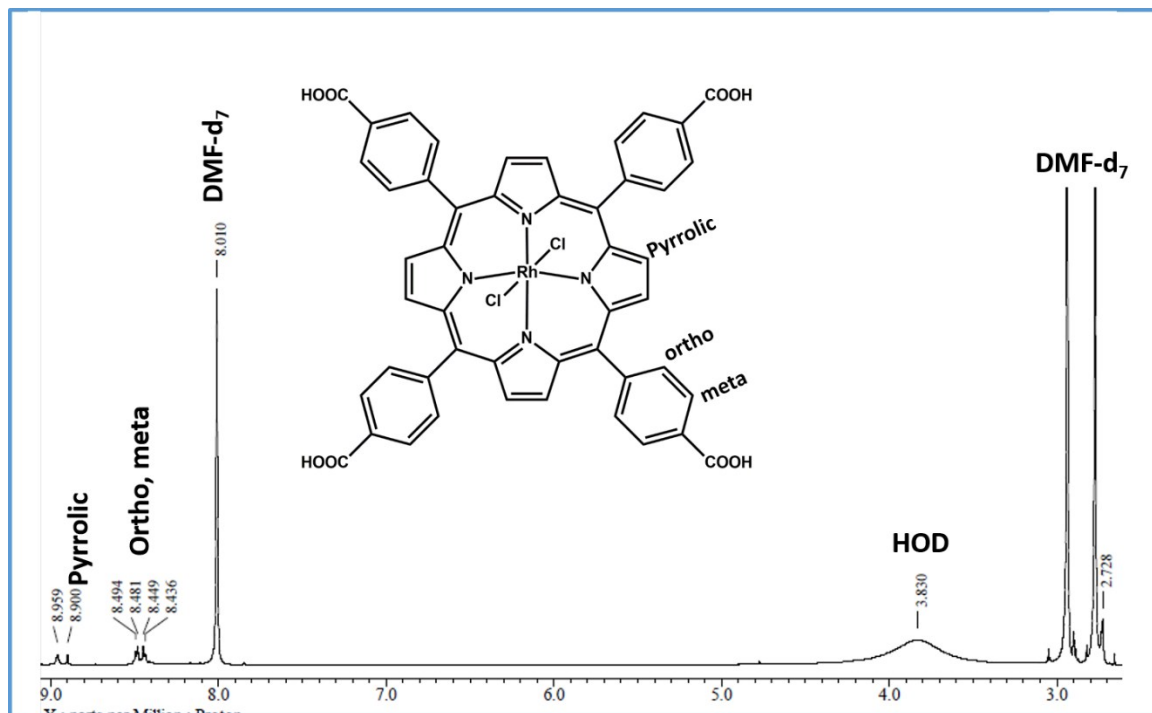

Figure S2;  $^1\text{H}$  NMR spectrum of RhTCPP ( $\text{DMF-d}_7$ , 400MHz)

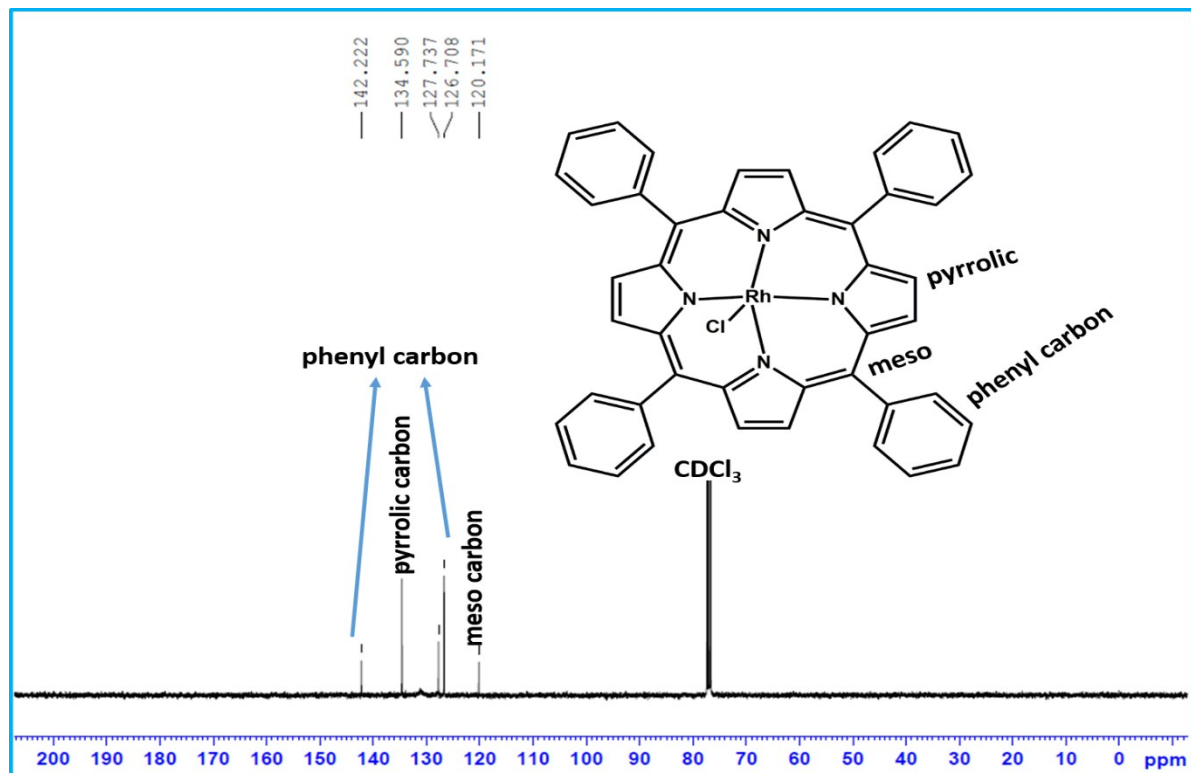

## Supplementary Materials

Figure S3;  $^{13}\text{C}$  NMR spectrum of RhTPP

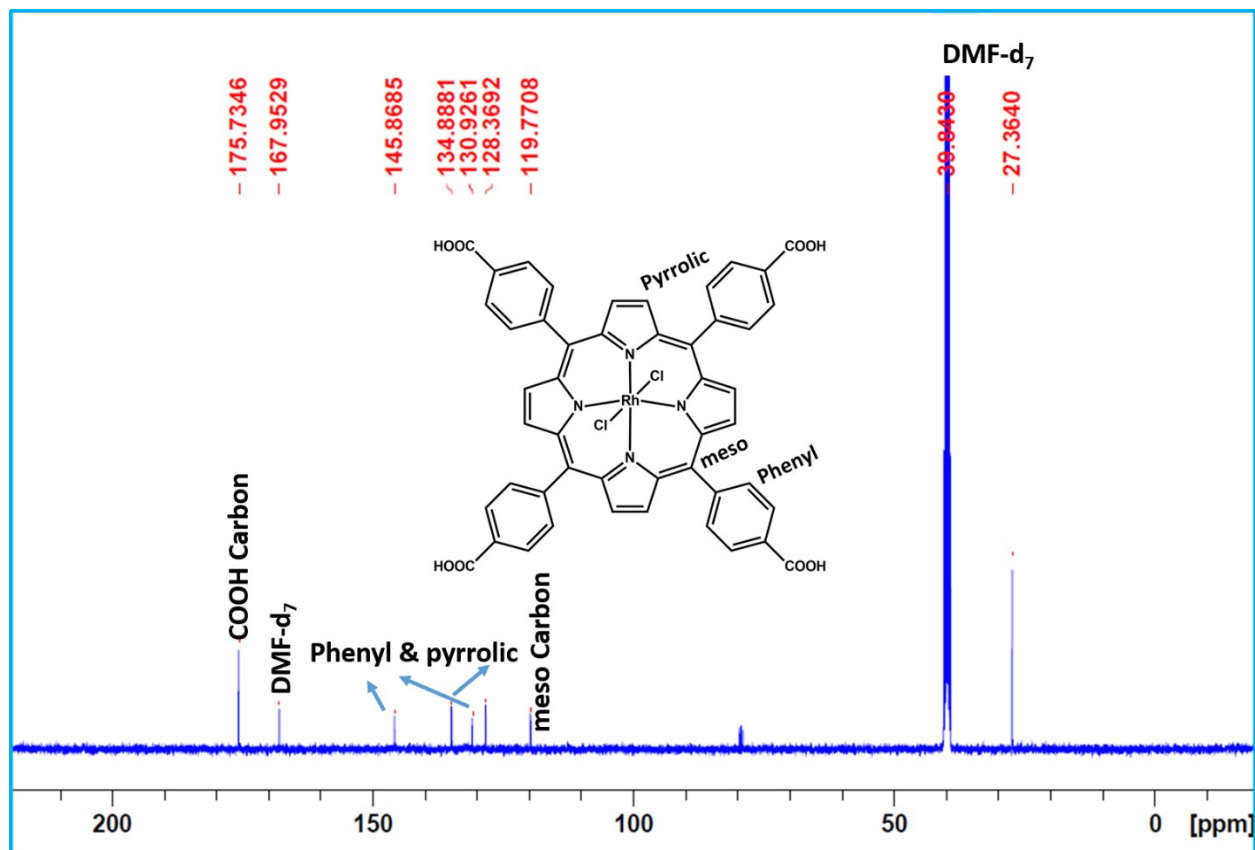

Figure S4;  $^{13}\text{C}$  NMR spectrum of RhTCPP

## Supplementary Materials

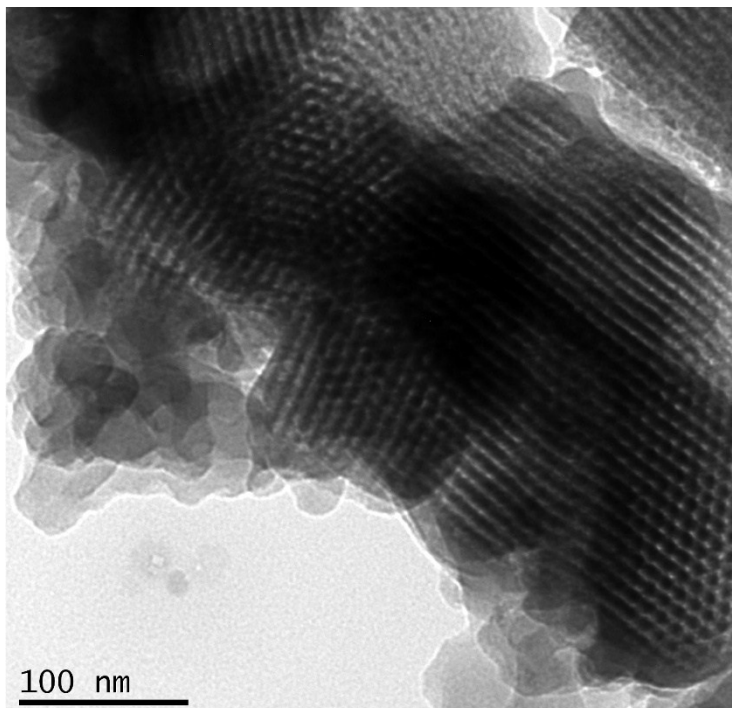

**Figure S5;** High resolution transmission electron microscopy (HR-TEM) micrographs of RhTPP-SBA-AM

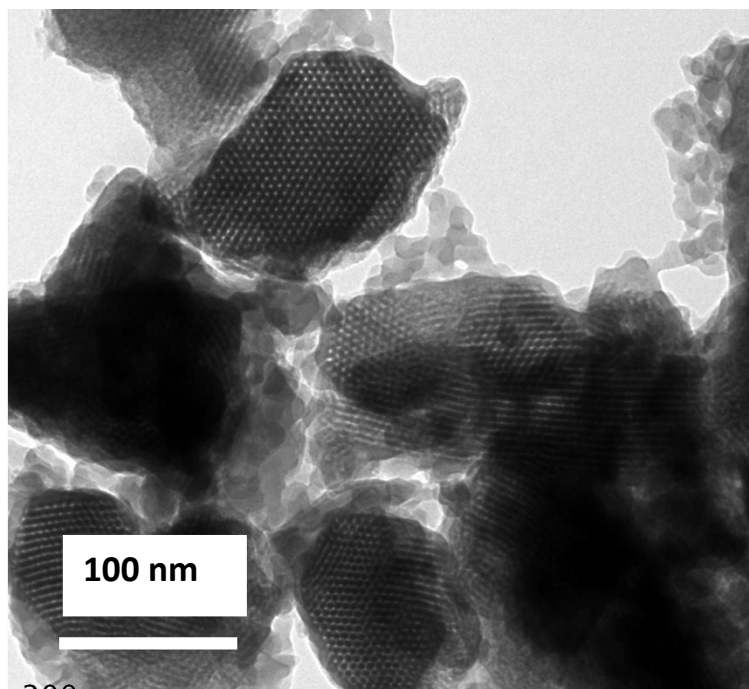

**Figure S5;** High resolution transmission electron microscopy (HR-TEM) micrographs RhTCCP-SBA-AM

## Supplementary Materials

**Table S1:** Quenching studies by filtering the solution (Hot filtration study).

| Catalysts     | Conversion (%) | Selectivity (%) |      |
|---------------|----------------|-----------------|------|
|               |                | GVL             | Diol |
| RhTPP-SBA-AM  | 1.4            | 92              | 8    |
| RhTCPP-SBA-AM | 1.6            | 86              | 12   |

**Reaction Conditions:** LA = 5mmol, Solvent (IPA) = 3mL, Pressure = 10 bar H<sub>2</sub>, time = 12 hrs, Temperature = 100 °C, Catalyst RhTPP-SBA-AM/RhTCPP-SBA-AM= 0.1g.

**Table S2;** Levulinic acid hydrogenation using ruthenium porphyrin and iridium porphyrin complex.

| Catalysts | Conversion (%) | Selectivity (%) |      |              |
|-----------|----------------|-----------------|------|--------------|
|           |                | GVL             | Diol | Valeric acid |
| IrTPP     | 93.8           | 87              | 9    | 4            |
| RuTPP     | 89             | 62              | 30   | 8            |
| RhTPP     | 100            | 100             | --   |              |

**Reaction Conditions:** LA = 5mmol, Solvent (IPA) = 3mL, Pressure = 10 bar H<sub>2</sub>, time = 12 hrs, Temperature = 100 °C, Catalyst RhTPP/ IrTPP/RhTPP = 0.01g.

## Supplementary Materials

**Table S3;** Comparison of levulinic acid hydrogenation reaction by various reported catalysts.

| Catalysts                                                                                                      | Reaction condition                                                                                                                                          | Conversion /<br>GVL<br>selectivity(%) | Refer<br>ence |
|----------------------------------------------------------------------------------------------------------------|-------------------------------------------------------------------------------------------------------------------------------------------------------------|---------------------------------------|---------------|
| Hybrid Ru-containing catalysts, based on poly(propylene imine) (PPI) dendrimers, immobilized in silica         | Reaction conditions are: 0.3 mL levulinic acid, 0.3 mL of water, substrate/Ru ~ 1700, Time = 1 h., H <sub>2</sub> pressure = 30 bars, Temp = 80 °C.         | 80/95                                 | 10            |
| Nickel Catalysts Supported on Aluminum Oxide                                                                   | 30%Ni/Al <sub>2</sub> O <sub>3</sub> = 0.1g, Levulinic acid = 1g , Solvent = water, Time = 3 hr Temp= 200 °C, H <sub>2</sub> pressure = 3MPa                | 96.2/90.3                             | 14            |
| Nickel Catalysts Supported on Aluminum Oxide                                                                   | 30%Ni/Al <sub>2</sub> O <sub>3</sub> = 0.1g, Levulinic acid = 1g , Solvent = dioxane, Time = 2 hr, Temp= 180 °C, H <sub>2</sub> pressure = 3MPa             | 100/98.3                              | 14            |
| Ru(acac) <sub>3</sub> ,with alkyl-bis(m-sulfonated-phenyl)- and dialkyl-(m-sulfonated-phenyl)phosphine ligands | Levulinic acid = 34.02 g, Catalysts Ru(acac) <sub>3</sub> =0.046 mmol, Time = 1.8 hr, Temp = 140 °C, H <sub>2</sub> pressure = 100 bar                      | 99.9                                  | 12            |
| Ru supported on Carbon                                                                                         | Levulinic acid = 34.02 g, Catalysts Ru(acac) <sub>3</sub> =0.046 mmol, Time = 1.8 hr, Temp = 150 °C, H <sub>2</sub> pressure = 55 bar                       | 80/90                                 | 27            |
| iridium pincer complexes                                                                                       | Levulinic acid = 3 mmol, Catalyst 0.15 mol% ligand, 1.2 eqv base KOH, Solvent = 4ml methanol, Time = 15 hr, Temp = 100 °C, H <sub>2</sub> pressure = 50 bar | 89/96                                 | 93            |
| Ru-PP/CNT based catalyst (                                                                                     | Levulinic acid = 1.0 mmol, catalyst = 50 mg,                                                                                                                |                                       |               |

## Supplementary Materials

|                                                                |                                                                                                                                             |         |                     |
|----------------------------------------------------------------|---------------------------------------------------------------------------------------------------------------------------------------------|---------|---------------------|
| Polymeric ruthenium porphyrin-functionalized carbon nanotubes) | base, NaHCO <sub>3</sub> 50 mg, solvent methanol = 5 mL, H <sub>2</sub> pressure = 3.0 MPa, T <sub>epm</sub> = 100°C time = 10 h            |         |                     |
| [Ru(triphos)(TMM) catalysts                                    |                                                                                                                                             |         |                     |
| ( [Ru(Triphos)(TMM)]                                           | Levulinic acid = 1.0 mmol, catalyst = 50 mg,                                                                                                |         |                     |
| (Triphos= 1,1,1-                                               | base, solvent methanol = 5 mL, H <sub>2</sub> pressure =                                                                                    | 99      | 94                  |
| tris(diphenylphosphinometh                                     | 50 bar, T <sub>epm</sub> = 140°C, time = 18 h                                                                                               |         |                     |
| yl)ethane, TMM = tri-                                          |                                                                                                                                             |         |                     |
| methylene methane)                                             |                                                                                                                                             |         |                     |
| Ruthenium–N-Triphos                                            | Levulinic acid = 10 mmol LA, Solvent THF = 20 mL, 0.5 mol % complex or 0.5 mol %                                                            | 85      | 95                  |
| Complexes                                                      | [Ru(acac) <sub>3</sub> ] and 1.0 mol % ligand, time = 25 h, H <sub>2</sub> pressure = 65 bar, T <sub>epm</sub> = 150°C                      |         |                     |
| Rh based catalysts                                             | Levulinic acid = 5mmol, Catalyst RhTPP = 0.01g, Solvent (IPA) = 3mL, H <sub>2</sub> Pressure = 10 bar, time = 12 hrs, Temperature = 100 °C, | 100/100 | Pres<br>ent<br>work |

**Table S4:** Conversion of various substrates using the RhTPP, RhTPP–SBA-AM, RhTCPP and RhTCPP–SBA-AM Catalysts†.

# Supplementary Materials

| Substrate                                                                                               | Product                                                                                                         | Product Yield (%) |              |        |               |
|---------------------------------------------------------------------------------------------------------|-----------------------------------------------------------------------------------------------------------------|-------------------|--------------|--------|---------------|
|                                                                                                         |                                                                                                                 | RhTPP             | RhTPP-SBA-AM | RhTCPP | RhTCPP-SBA-AM |
| 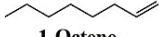<br>1-Octene           | <br>Octane                     | 100               | 100          | 100    | 100           |
| <br>CycloOctene        | <br>cyclooctane                | 100               | 100          | 100    | 100           |
| <br>Benzaldehyde       | <br>Benzyl alcohol             | 61                | 76           | 100    | 96            |
| <br>Nitrobenzene       | <br>Aniline                    | 82                | 54           | 70     | 72            |
| <br>Furfural           | <br>Furfuryl Alcohol           | 80                | 87           | 85     | 68            |
| <br>Eugenol          | <br>2-methoxy-4-propylphenol | 83                | 85           | 100    | 99            |
| <br>Cinnamylaldehyde | <br>Cinnamylalcohol          | 58                | 98           | 96     | 85            |

‡ Reaction Conditions: LA = 5mmol, Solvent (IPA) = 3mL, Pressure = 10 bar H<sub>2</sub>, time = 12 hrs, Temperature = 100 °C, Catalyst RhTPP/ RhTCPP = 0.01g, RhTPP-SBA-AM/ RhTCPP-SBA-AM= 0.1g
